# Supplementary material for: A Recovery-Oriented Intervention for People With Psychosis: A Pilot Randomized Controlled Trial
Source: Atypon-hosted journal article supplement (doi:10.1176/appi.ps.202000843), 2022-06-09
Supplement: appi.ps.202000843.ds001.pdf [file appi.ps.202000843.ds001.pdf]

**SFigure 1. Consort chart of recruitment and follow-up process.**

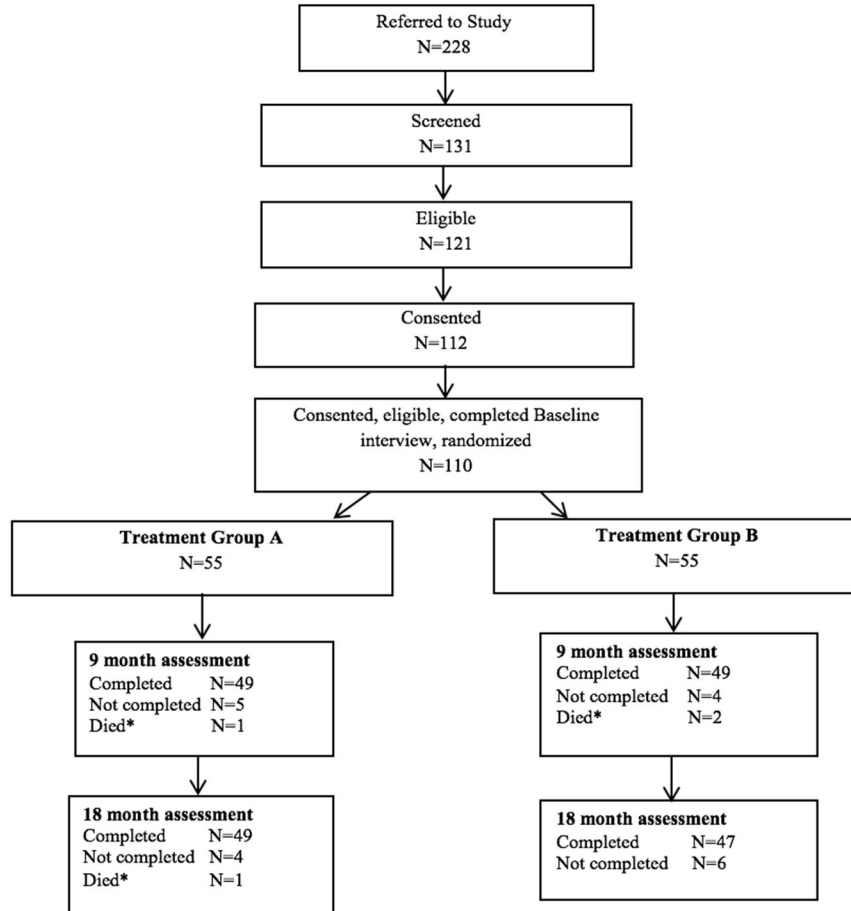

\*Causes of death: lung infection, pulmonary embolism, brain tumor, cardiac event.

**STable 1a. Domains and items from WHO-QoL-BREF**

| <b>Domains</b>       | <b>Items</b>                                                                                                                                                                                                                                                                                                                                                                                                                                                                                                                                |
|----------------------|---------------------------------------------------------------------------------------------------------------------------------------------------------------------------------------------------------------------------------------------------------------------------------------------------------------------------------------------------------------------------------------------------------------------------------------------------------------------------------------------------------------------------------------------|
| General items        | 1. How would you rate your quality of life?<br>2. How satisfied are you with your health?                                                                                                                                                                                                                                                                                                                                                                                                                                                   |
| Physical Health      | 3. To what extent do you feel that physical pain prevents you from doing what you need to do?<br>4. How much do you need any medical treatment to function in your daily life?<br>10. Do you have enough energy for everyday life?<br>15. How well are you able to get around?<br>16. How satisfied are you with your sleep?<br>17. How satisfied are you with your ability to perform your daily living activities?<br>18. How satisfied are you with your capacity for work?                                                              |
| Psychological Health | 5. How much do you enjoy life?<br>6. To what extent do you feel your life to be meaningful?<br>7. How well are you able to concentrate?<br>11. How much are you able to accept your bodily appearance?<br>19. How satisfied are you with yourself?<br>26. How often do you have negative feelings such as blue mood, despair, anxiety, depression?                                                                                                                                                                                          |
| Social Relationships | 20. How satisfied are you with your personal relationships (friends, relatives, acquaintances, colleagues)?<br>21. How satisfied are you with your sex life?<br>22. How satisfied are you with the support you get from your friends?                                                                                                                                                                                                                                                                                                       |
| Environment          | 8. How safe do you feel in your daily life?<br>9. How healthy is your physical environment? (climate, noise, pollution)<br>12. Do you have enough money to meet your needs?<br>13. How much is the information that you need in your day-to-day life available to you?<br>14. To what extent do you have the opportunity for leisure activities?<br>23. How satisfied are you with the conditions of your living place?<br>24. How satisfied are you with your access to health services?<br>25. How satisfied are you with your transport? |

**STable 1b. Items and questions from CAN**

| <b>Items</b>           | <b>Question</b>                                                                                    |
|------------------------|----------------------------------------------------------------------------------------------------|
| Accommodation          | Does the person have a current place to stay?                                                      |
| Food                   | Does the person have difficulty in getting enough to eat?                                          |
| Looking after home     | Does the person have difficulty looking after the home?                                            |
| Self-care              | Does the person have difficulty taking care of him/herself?                                        |
| Daytime activities     | Does the person have difficulty with regular, appropriate daytime activities?                      |
| Physical health        | Does the person have any physical disability or any physical illness?                              |
| Psychotic symptoms     | Does the person have any psychotic symptoms?                                                       |
| Information            | Has the person had clear verbal or written information about their health condition and treatment? |
| Psychological distress | Does the person suffer from current psychological distress?                                        |
| Safety to self         | Is the person a danger to him- or herself?                                                         |
| Safety to others       | Is the person a current or potential risk to other people's safety?                                |
| Alcohol                | Does the person drink excessively, or have a problem controlling his or her drinking?              |
| Drugs                  | Does the person have problems with drug misuse?                                                    |
| Company                | Does the person need help with social contact?                                                     |
| Intimate relationships | Does the person have any difficulty in finding a partner or maintaining a close relationship?      |
| Sexual expression      | Does the person have problems with his or her sex life?                                            |
| Child care             | Does the person have difficulty looking after his or her children?                                 |
| Education              | Does the person lack basic skills in numeracy and literacy?                                        |
| Telephone              | Does the person have any difficulty in getting access to or using a telephone?                     |
| Transport              | Does the person have any problems using public transport?                                          |
| Money                  | Does the person have problems managing his or her money?                                           |
| Benefits               | Is the person receiving all the benefits that he or she is entitled to?                            |

### STable 1c. Fidelity items and results.

Instructions: From the checklists, transfer each item’s percentage for Rio de Janeiro and Santiago. For each city, add the percentages, calculate the average percentage and select the fidelity score from the ratings likert scale.

| Ratings Likert Scale |         |         |           |           |
|----------------------|---------|---------|-----------|-----------|
| 1                    | 2       | 3       | 4         | 5         |
| <40%                 | 40%-54% | 55%-69% | 70%-84%   | ≥85%      |
| Minimal              | Poor    | Fair    | Very Good | Excellent |

| Fidelity Items*                         | Item % by city |          |
|-----------------------------------------|----------------|----------|
|                                         | Rio            | Santiago |
| Early Engagement                        | 28             | 28       |
| Early Intensive Contact                 | 48             | 47       |
| Early Community-Based Contact           | 27             | 49       |
| Phased Intervention                     | 97             | 90       |
| Focused                                 | 100            | 100      |
| Stepping Back for Try-Out               | 62             | 71       |
| Stepping Back for Sustainability        | 36             | 71       |
| Time-Limited                            | 100            | 100      |
| Continuity of Care                      | 100            | 100      |
| Progress Notes                          | 100            | 100      |
| Phase Plans                             | 100            | 100      |
| Closing Note                            | 100            | 100      |
| Peer Support Worker Role                | 100            | 100      |
| Community Mental Health Worker Role     | 100            | 100      |
| Clinical Supervision Role               | 100            | 100      |
| Fieldwork Coordination Role             | 100            | 100      |
| Appropriate Caseload Size               | 100            | 100      |
| Team Supervision Meetings               | 84             | 100      |
| Caseload Review                         | 100            | 100      |
| Coordinator to Supervisor Communication | 100            | 100      |
| Sum of item percentages                 | 1682           | 1756     |
| Average percentage:                     | 84.1           | 87.8     |
| <b>Fidelity Rating:</b>                 | <b>4</b>       | <b>5</b> |

\* For example, the item “Community Based” reflects whether in Phase One (Initiation) the team had multiple meetings in the community with the participant and informal/formal supports. Ratings were made by FM in Santiago and KS in Rio de Janeiro, based on review of records kept by the CTI-TS teams, observations of team meetings, focus groups with CT-TS workers, and interviews with supervisors.

## Supplement 1d. Sample size calculation

Since this was a pilot RCT, sample size was based on the precision (or margin of error) of our outcomes. Here we describe how precision was calculated for the WHO-QOL BREF. This formula uses the standard deviation (SD=15) for WHO-QOLBREF (19) total score as previously reported in the literature and an intra-class correlation coefficient of .01.

If we consider 30 subjects in treatment group in Santiago are correlated  $\Rightarrow$  No of independent

$$\text{observations in treatment group in Santiago} = \frac{30}{1 + (30 - 1)(.01)} = 23$$

Similarly, 25 subjects in treatment group in Rio are correlated  $\Rightarrow$  No of independent observations in treatment

$$\text{group in Rio} = \frac{25}{1 + (25 - 1)(.01)} = 20$$

Total number of independent observations per arm = 43

$$\text{Width of confidence interval} = 1.96(15) \sqrt{\frac{1}{43} + \frac{1}{43}} = 6.3$$

**STable 2. Baseline characteristics of the participants recruited in the trial by group and city**

|                            | Rio (N=50) |      |    |      | Santiago (N=60) |      |    |      |
|----------------------------|------------|------|----|------|-----------------|------|----|------|
|                            | CTI-TS     |      | UC |      | CTI-TS          |      | UC |      |
|                            | n          | %    | n  | %    | n               | %    | n  | %    |
| Age                        |            |      |    |      |                 |      |    |      |
| 21-29                      | 6          | 60   | 4  | 40   | 7               | 43.8 | 9  | 56.3 |
| 30-39                      | 6          | 50   | 6  | 50   | 10              | 62.5 | 6  | 37.5 |
| 40-49                      | 6          | 42.9 | 8  | 57.1 | 8               | 53.3 | 7  | 46.7 |
| 50-65                      | 7          | 50   | 7  | 50   | 5               | 38.5 | 8  | 61.5 |
| Gender                     |            |      |    |      |                 |      |    |      |
| Female                     | 16         | 55.2 | 13 | 44.8 | 14              | 43.8 | 18 | 56.3 |
| Male                       | 9          | 42.9 | 12 | 57.1 | 16              | 57.1 | 12 | 42.9 |
| Diagnosis                  |            |      |    |      |                 |      |    |      |
| Non-affective psychosis    | 17         | 43.6 | 22 | 56.4 | 13              | 48.1 | 14 | 51.9 |
| Affective psychosis        | 8          | 72.7 | 3  | 27.3 | 17              | 51.5 | 16 | 48.5 |
| Course type                |            |      |    |      |                 |      |    |      |
| Continuous                 | 10         | 41.7 | 14 | 58.3 | 6               | 40   | 9  | 60   |
| Episodic                   | 8          | 50   | 8  | 50   | 18              | 54.5 | 15 | 45.5 |
| Other                      | 4          | 57.1 | 3  | 42.9 | 6               | 50   | 6  | 50   |
| Education                  |            |      |    |      |                 |      |    |      |
| No school or incomplete    | 11         | 47.8 | 12 | 52.2 | 9               | 45   | 11 | 55   |
| Some high school           | 1          | 16.7 | 5  | 83.3 | 3               | 37.5 | 5  | 62.5 |
| High school grad           | 8          | 57.1 | 6  | 42.9 | 9               | 52.9 | 8  | 47.1 |
| More than high school      | 3          | 75   | 1  | 25   | 9               | 60   | 6  | 40   |
| Living situation           |            |      |    |      |                 |      |    |      |
| Living alone               | 5          | 50   | 5  | 50   | 4               | 40   | 6  | 60   |
| Living with spouse/partner | 4          | 66.7 | 2  | 33.3 | 7               | 43.8 | 9  | 56.3 |
| Living with family         | 13         | 46.4 | 15 | 53.6 | 18              | 54.5 | 15 | 45.5 |
| Other living situation     | 3          | 50   | 3  | 50   | 1               | 100  | 0  | 0    |
| Employment                 |            |      |    |      |                 |      |    |      |
| Employed                   | 1          | 50   | 1  | 50   | 7               | 38.9 | 11 | 61.1 |
| Occasional work            | 1          | 33.3 | 2  | 66.7 | 10              | 71.4 | 4  | 28.6 |
| Retired/Pensioner          | 4          | 50   | 4  | 50   | 2               | 33.3 | 4  | 66.7 |
| Unemployed                 | 19         | 51.4 | 18 | 48.6 | 11              | 50   | 11 | 50   |

**STable 3. Baseline adjusted analyses of primary outcomes WHO-QOL and CAN**

|                                          | Baseline adjusted* |               |      |
|------------------------------------------|--------------------|---------------|------|
|                                          | Estimate<br>**     | 95% CI        | p    |
| WHO-QOL                                  |                    |               |      |
| How would you rate your quality of life? | -.02               | -.21, .18     | .875 |
| How satisfied are you with your health?  | .11                | .09, -.077    | .253 |
| Dimensions                               |                    |               |      |
| Physical                                 | -.73               | -5.35, 3.89   | .757 |
| Psychological                            | -.27               | -7.06, 6.53   | .938 |
| Social                                   | 1.73               | -6.14, 9.61   | .666 |
| Environment                              | .13                | -5.35, 5.61   | .964 |
| Recreation                               | -.23               | -11.43, 11.01 | .969 |
|                                          |                    |               |      |
| CAN mean total ***                       | .11                | -.43, .21     | .20  |

\* This estimate compares means between CTI-TS and UC participants on WHOQOL and CAN items at 18 months adjusted for baseline score, city, age, gender, diagnosis, course type, education, living situation, and employment.

For WHO-QoL, each individual item is scored from 1 to 5 and then transformed linearly to a 0–100-scale; higher means represent better quality of life.. For CAN, the scores range from 0–9 or more unmet needs; higher means more unmet needs.

\*\* The UC group is the reference for this estimate.

\*\*\* Fourth-square root transformation.

**STable 4. Bivariate analysis for primary outcomes 18 months vs baseline within each arm\***

| <b>WHO-QoL</b>                              | <b>CTI-TS</b>      |                     |                                      | <b>UC</b>          |                     |                                      |
|---------------------------------------------|--------------------|---------------------|--------------------------------------|--------------------|---------------------|--------------------------------------|
|                                             | Baseline<br>(n=55) | 18 months<br>(n=49) | p-values for<br>paired t-<br>student | Baseline<br>(n=55) | 18 months<br>(n=47) | p-values for<br>paired t-<br>student |
| How would you rate<br>your quality of life? | 2.9                | 3.3                 | .090                                 | 2.6                | 3.2                 | <.001                                |
| How satisfied are you<br>with your health?  | 2.6                | 3.3                 | .057                                 | 2.6                | 3.1                 | .112                                 |
| <b>Dimensions</b>                           |                    |                     |                                      |                    |                     |                                      |
| Physical                                    | 58.1               | 61.6                | .200                                 | 51.3               | 59                  | .008                                 |
| Psychological                               | 48.6               | 56.6                | .013                                 | 39.8               | 53.9                | <.001                                |
| Social                                      | 50                 | 55.3                | .099                                 | 49.1               | 57                  | .056                                 |
| Environment                                 | 52.8               | 58.6                | .012                                 | 48.4               | 56.9                | .003                                 |
| Recreation                                  | 49.6               | 52.1                | .340                                 | 44.1               | 50.4                | .045                                 |
| <b>CAN</b>                                  | Baseline<br>(n=55) | 18 months<br>(n=40) | p-values for<br>paired t-<br>student | Baseline<br>(n=55) | 18 months<br>(n=39) | p-values for<br>paired t-<br>student |
| Mean of number of<br>unmet needs            | 1.71               | .61                 | .011                                 | 1.91               | .41                 | <.0001                               |

\*Here we compare means between CTI-TS and UC participants on WHOQOL and CAN items at 18 months  
For WHO-QoL, each individual item is scored from 1 to 5 and then transformed linearly to a 0–100-scale; higher means represent better quality of life. For CAN, the scores range from 0–9 or more unmet needs; higher means more unmet needs.
